# Supplementary material for: Social Isolation and Memory Decline in Later-life
Source: PubMed Central journal article supplement (PMC6963696; doi:10.1093/geronb/gbz152), 2019-11-29
Supplement: gbz152_suppl_supplementary_tables.pdf [file gbz152_suppl_supplementary_tables.pdf]

**Supplementary Table 1.** Distribution of the sample by time-invariant covariates at wave 1

| Variables           | Men ( <i>n</i> = 5110) |          | Women ( <i>n</i> = 6123) |          |
|---------------------|------------------------|----------|--------------------------|----------|
|                     | % or mean (SD)         | <i>n</i> | % or mean (SD)           | <i>n</i> |
| Age in years        | 64.8 (9.87)            | 5110     | 65.4 (10.40)             | 6123     |
| Education           |                        | 5110     |                          | 6115     |
| Tertiary            | 27.8                   |          | 17.4                     |          |
| Secondary           | 22.0                   |          | 21.6                     |          |
| Other               | 14.2                   |          | 13.4                     |          |
| No qualification    | 36.6                   |          | 47.6                     |          |
| Net wealth quintile | 3.1 (1.43)             | 5076     | 2.3 (1.40)               | 6058     |
| House owner         | 81.2                   | 5090     | 78.8                     | 6091     |
| Smoking             |                        | 5104     |                          | 6115     |
| Current smoker      | 17.4                   |          | 18.1                     |          |
| Past smoker         | 56.6                   |          | 38.3                     |          |
| Never smoked        | 26.0                   |          | 43.6                     |          |
| Physical activity   | 2.0 (0.88)             | 5104     | 1.9 (0.88)               | 6114     |

**Supplementary Table 2.** Distribution of social isolation, memory and time-varying covariates in men, waves 1- 6 (% or mean (SD) in the adjusted model<sup>a</sup>)

| Variables                       | Wave 1<br>(2002/03)<br><i>n</i> = 5110 <sup>b</sup> | Wave 2<br>(2004/05)<br><i>n</i> = 3973 <sup>b</sup> | Wave 3<br>(2006/07)<br><i>n</i> = 3332 <sup>b</sup> | Wave 4<br>(2008/09)<br><i>n</i> = 2896 <sup>b</sup> | Wave 5<br>(2010/11)<br><i>n</i> = 2722 <sup>b</sup> | Wave 6<br>(2012/13)<br><i>n</i> = 2457 <sup>b</sup> | Growth <sup>c</sup>        |
|---------------------------------|-----------------------------------------------------|-----------------------------------------------------|-----------------------------------------------------|-----------------------------------------------------|-----------------------------------------------------|-----------------------------------------------------|----------------------------|
| Social isolation score          | 1.2 (1.04)<br><i>n</i> = 4650                       | 1.2 (0.95)<br><i>n</i> = 3456                       | 1.3 (0.97)<br><i>n</i> = 2876                       | 1.2 (0.93)<br><i>n</i> = 2456                       | 1.4 (0.99)<br><i>n</i> = 2395                       | 1.4 (0.98)<br><i>n</i> = 2124                       | m: 0.03***<br>r: 0.01***   |
| Memory score                    | 4.6 (1.77)<br><i>n</i> = 5015                       | 4.6 (1.81)<br><i>n</i> = 3865                       | 4.6 (1.91)<br><i>n</i> = 3264                       | 4.4 (1.89)<br><i>n</i> = 2804                       | 4.3 (2.01)<br><i>n</i> = 2591                       | 4.2 (2.06)<br><i>n</i> = 2336                       | m: -0.04***<br>r: 0.02***  |
| Depressive symptoms (CES-D8 >2) | 20<br><i>n</i> = 5015                               | 21<br><i>n</i> = 3845                               | 20<br><i>n</i> = 3255                               | 20<br><i>n</i> = 2793                               | 24<br><i>n</i> = 2581                               | 21<br><i>n</i> = 2330                               | m: -0.01<br>r: 0.00        |
| Liming long-term illness        | 35<br><i>n</i> = 5107                               | 38<br><i>n</i> = 3914                               | 38<br><i>n</i> = 3330                               | 40<br><i>n</i> = 2895                               | 42<br><i>n</i> = 2719                               | 47<br><i>n</i> = 2456                               | m: 0.03***<br>r: 0.004***  |
| Working or doing voluntary work | 49<br><i>n</i> = 5108                               | 46<br><i>n</i> = 3973                               | 41<br><i>n</i> = 3332                               | 35<br><i>n</i> = 2896                               | 30<br><i>n</i> = 2722                               | 26<br><i>n</i> = 2457                               | m: -0.05***<br>r: 0.003*** |
| Age among those in the sample   | 64.8 (9.87)                                         | 66.0 (9.51)                                         | 67.5 (9.23)                                         | 68.8 (8.78)                                         | 70.1 (8.29)                                         | 71.5 (8.03)                                         |                            |

<sup>a</sup> Adjusted for age, education, net wealth quintile, tenure status, limiting long-term illness, smoking and physical activity. <sup>b</sup> Core sample with full or partial interview. <sup>c</sup> Linear mean growth (m) and residual variance growth (r) in Latent Growth Curve, \**p* < 0.05, \*\* *p* < 0.01, \*\*\**p* < 0.001.

**Supplementary Table 3.** Distribution of social isolation, memory and time-varying covariates in women, waves 1- 6 (% or mean (SD) in the adjusted model<sup>a</sup>)

|                                 | Wave 1<br>(2002/03)               | Wave 2<br>(2004/05)               | Wave 3<br>(2006/07)               | Wave 4<br>(2008/09)               | Wave 5<br>(2010/11)               | Wave 6<br>(2012/13)               |                            |
|---------------------------------|-----------------------------------|-----------------------------------|-----------------------------------|-----------------------------------|-----------------------------------|-----------------------------------|----------------------------|
| Variables                       | 1 ( <i>n</i> = 6123) <sup>b</sup> | 2 ( <i>n</i> = 4799) <sup>b</sup> | 3 ( <i>n</i> = 4157) <sup>b</sup> | 4 ( <i>n</i> = 3685) <sup>b</sup> | 5 ( <i>n</i> = 3480) <sup>b</sup> | 6 ( <i>n</i> = 3168) <sup>b</sup> | Growth <sup>c</sup>        |
| Social isolation score          | 1.1 (1.04)<br><i>n</i> = 5532     | 1.2 (1.04)<br><i>n</i> = 4227     | 1.2 (1.03)<br><i>n</i> = 3551     | 1.2 (1.02)<br><i>n</i> = 3112     | 1.4 (1.04)<br><i>n</i> = 3057     | 1.4 (1.06)<br><i>n</i> = 2716     | m: 0.04***<br>r: 0.01***   |
| Memory score                    | 4.8 (1.81)<br><i>n</i> = 6020     | 4.9 (1.84)<br><i>n</i> = 4753     | 4.8 (1.89)<br><i>n</i> = 4065     | 4.7 (1.93)<br><i>n</i> = 3562     | 4.5 (1.95)<br><i>n</i> = 3328     | 4.5 (1.97)<br><i>n</i> = 3023     | m: -0.06***<br>r: 0.02***  |
| Depressive symptoms (CES-D8 >2) | 28<br><i>n</i> = 6025             | 28<br><i>n</i> = 4743             | 27<br><i>n</i> = 4049             | 27<br><i>n</i> = 3551             | 27<br><i>n</i> = 3309             | 24<br><i>n</i> = 3001             | m: 0.01<br>r: 0.02***      |
| Limiting long-term illness      | 35<br><i>n</i> = 6117             | 39<br><i>n</i> = 4799             | 41<br><i>n</i> = 4155             | 43<br><i>n</i> = 3684             | 46<br><i>n</i> = 3479             | 48<br><i>n</i> = 3165             | m: 0.002***<br>r: 0.003*** |
| Working or doing voluntary work | 42<br><i>n</i> = 6118             | 45<br><i>n</i> = 4763             | 35<br><i>n</i> = 4157             | 30<br><i>n</i> = 3685             | 25<br><i>n</i> = 3480             | 21<br><i>n</i> = 3168             | m: -0.04***<br>r: 0.003*** |
| Age among those in the sample   | 65.4 (10.40)                      | 66.8 (10.06)                      | 68.4 (9.79)                       | 69.7 (9.26)                       | 70.9 (8.81)                       | 72.5 (8.44)                       |                            |

<sup>a</sup> Adjusted for age, education, net wealth quintile, tenure status, limiting long-term illness, smoking and physical activity. <sup>b</sup> Core sample with full or partial interview. <sup>c</sup> Linear mean growth (m) and residual variance growth (r) in Latent Growth Curve, \**p* < 0.05, \*\**p* < 0.01, \*\*\**p* < 0.001.

**Supplementary Table 4.** Unstandardized parameter estimates (Standard Error) for the univariate Latent Change Score models of social isolation and memory in waves 1 – 6 (W1 - W6)

|                                             | Social isolation |                 | Memory          |                 |
|---------------------------------------------|------------------|-----------------|-----------------|-----------------|
|                                             | Men              | Women           | Men             | Women           |
| <b>Intercepts</b>                           |                  |                 |                 |                 |
| Level                                       | 1.01 (0.04)***   | 1.00 (0.03)***  | 5.08 (0.05)***  | 5.47 (0.05)***  |
| Growth                                      | 0.17 (0.11)      | 0.42 (0.16)*    | -0.43 (0.44)    | -1.01 (0.41)*   |
| <b>Residual variances</b>                   |                  |                 |                 |                 |
| Observed variable                           | 0.41 (0.01)***   | 0.33 (0.01)***  | 1.26 (0.02)***  | 1.32 (0.02)***  |
| Level                                       | 0.74 (0.02)***   | 0.63 (0.02)***  | 0.99 (0.04)***  | 1.04 (0.05)***  |
| Growth                                      | 0.03 (0.02)      | 0.09 (0.08)     | 0.02 (0.01)*    | 0.04 (0.02)*    |
| Association between level and growth        | 0.07 (0.08)      | -0.24 (0.11)*   | -0.61 (0.59)    | 0.48 (0.33)     |
| Proportional change                         | -0.14 (0.11)     | -0.40 (0.17)*   | -0.61 (0.59)    | -0.46 (0.31)    |
| Change on change                            | -0.06 (0.24)     | 1.31 (0.46)**   | 1.91 (1.27)     | 1.67 (0.68)*    |
| <i>Effects of time-invariant covariates</i> |                  |                 |                 |                 |
| Age on level                                | 0.01 (0.00)***   | 0.02 (0.01)***  | -0.06 (0.00)*** | -0.06 (0.00)*** |
| Age on growth                               | 0.01 (0.00)**    | 0.01 (0.00)**   | -0.04 (0.04)    | 0.03 (0.02)     |
| Education on level (ref=tertiary)           |                  |                 |                 |                 |
| Secondary                                   | 0.11 (0.04)**    | 0.02 (0.04)     | -0.27 (0.05)*** | -0.22 (0.05)*** |
| Other                                       | -0.01 (0.05)     | -0.06 (0.04)    | -0.66 (0.06)*** | -0.58 (0.06)*** |
| No qualification                            | 0.21 (0.04)***   | 0.05 (0.04)     | -0.97 (0.05)*** | -0.96 (0.05)*** |
| Education on growth (ref=tertiary)          |                  |                 |                 |                 |
| Secondary                                   | 0.03 (0.02)      | 0.01 (0.00)     | -0.16 (0.16)    | -0.10 (0.07)    |
| Other                                       | 0.04 (0.02)*     | -0.02 (0.02)    | -0.40 (0.39)    | -0.26 (0.18)    |
| No qualification                            | 0.04 (0.03)      | 0.02 (0.02)     | -0.59 (0.57)    | -0.43 (0.30)    |
| Wealth on level                             | -0.04 (0.01)***  | -0.07 (0.01)*** | 0.12 (0.01)***  | 0.13 (0.01)***  |
| Wealth on growth                            | -0.01 (0.00)*    | -0.03 (0.01)*   | 0.07 (0.07)     | 0.06 (0.04)     |
| Home ownership on level                     | -0.46 (0.05)***  | -0.29 (0.04)*** | 0.12 (0.06)*    | 0.18 (0.05)***  |
| Home ownership on growth                    | -0.04 (0.05)     | -0.12 (0.05)    | 0.07 (0.08)     | -0.08 (0.06)    |

Smoking on level (ref=never  
smoked)

|                |              |                |              |             |
|----------------|--------------|----------------|--------------|-------------|
| Current smoker | 0.06 (0.05)  | 0.22 (0.04)*** | 0.07 (0.04)  | 0.03 (0.05) |
| Past smoker    | -0.04 (0.04) | 0.01 (0.03)    | 0.11 (0.04)* | 0.03 (0.04) |

Smoking on growth (ref=never  
smoked)

|                |               |               |             |             |
|----------------|---------------|---------------|-------------|-------------|
| Current smoker | 0.08 (0.03)** | 0.10 (0.04)** | 0.02 (0.05) | 0.00 (0.03) |
| Past smoker    | -0.01 (0.01)  | 0.01 (0.01)   | 0.06 (0.07) | 0.02 (0.02) |

|                             |                 |                 |                |                |
|-----------------------------|-----------------|-----------------|----------------|----------------|
| Physical activity on level  | -0.11 (0.02)*** | -0.10 (0.02)*** | 0.11 (0.03)*** | 0.17 (0.02)*** |
| Physical activity on growth | -0.02 (0.01)    | -0.04 (0.02)*   | 0.06 (0.07)    | 0.08 (0.05)*   |

*Time-varying effects*

|                               |                 |                 |                 |                 |
|-------------------------------|-----------------|-----------------|-----------------|-----------------|
| Limiting long-term illness W1 | -0.01 (0.03)    | 0.06 (0.02)*    | -0.16 (0.04)*** | -0.04 (0.04)    |
| W2                            | -0.08 (0.03)**  | 0.01 (0.02)     | -0.02 (0.04)    | 0.04 (0.04)     |
| W3                            | -0.03 (0.03)    | 0.01 (0.02)     | 0.04 (0.05)     | 0.01 (0.04)     |
| W4                            | -0.16 (0.03)*** | -0.10 (0.02)*** | -0.03 (0.05)    | -0.03 (0.04)    |
| W5                            | 0.07 (0.03)*    | 0.02 (0.03)     | -0.01 (0.06)    | -0.12 (0.05)**  |
| W6                            | 0.10 (0.04)**   | 0.07 (0.03)*    | -0.14 (0.06)*   | -0.06 (0.05)    |
| Depression W1                 | 0.02 (0.01)**   | 0.02 (0.01)**   | -0.02 (0.01)    | -0.03 (0.01)**  |
| W2                            | 0.04 (0.01)***  | 0.03 (0.00)***  | -0.06 (0.01)*** | -0.03 (0.01)**  |
| W3                            | 0.03 (0.01)**   | 0.04 (0.01)***  | -0.06 (0.02)*** | -0.03 (0.01)*   |
| W4                            | 0.06 (0.01)***  | 0.04 (0.01)***  | -0.07 (0.01)*** | -0.05 (0.01)*** |
| W5                            | 0.04 (0.01)***  | 0.03 (0.01)***  | -0.06 (0.02)*** | -0.04 (0.01)*** |
| W6                            | 0.04 (0.01)**   | 0.04 (0.01)***  | -0.05 (0.02)**  | -0.04 (0.01)**  |
| Working/voluntary work W1     | -0.03 (0.02)    | -0.04 (0.02)*   | -0.01 (0.04)    | -0.11 (0.03)**  |
| W2                            | 0.03 (0.03)     | 0.00 (0.02)     | 0.00 (0.04)     | 0.05 (0.04)     |
| W3                            | 0.01 (0.02)     | -0.01 (0.02)    | 0.10 (0.04)*    | 0.12 (0.04)**   |
| W4                            | -0.12 (0.03)*** | -0.07 (0.02)**  | 0.01 (0.04)     | 0.11 (0.04)**   |
| W5                            | -0.04 (0.03)    | -0.05 (0.02)*   | -0.03 (0.05)    | 0.04 (0.05)     |
| W6                            | -0.04 (0.03)    | -0.01 (0.03)    | 0.10 (0.06)     | 0.09 (0.06)     |

---

\* $p < 0.05$ , \*\* $p < 0.01$ , \*\*\* $p < 0.001$
